# Supplementary material
Source: publisher figshare collection journal article supplement (https://sage.figshare.com/ndownloader/files/14489414)
Supplement: Supplementary file 1 [file 14489414]

*** Results for Yoram Z. Haftel & Stephanie C. Hofmann. Forthcoming. "Rivalry and Overlap: Why Regional Economic Organizations Encroach on Security Organizations." Journal of Conflict Resolution ***

** Table 2: Ordered Probit Estimates of the Sources of REO Security Depth, 1982-2012 **

* model 1
xi: oprobit desecurity2 rso_1 lag_reo_mjrival01 lag_civilwar lag_concen lag_delegation lag_mem lag_ipd_std southx2 i.year, cluster(nbloc) robust

* model 2
xi: oprobit desecurity2 rso_hp lag_reo_mjrival01 lag_civilwar lag_concen lag_delegation lag_mem lag_ipd_std southx2 i.year, cluster(nbloc) robust

* model 3
xi: oprobit desecurity2 lag_gap_mjrival01 lag_civilwar lag_concen lag_delegation lag_mem lag_ipd_std southx2 i.year, cluster(nbloc) robust

* model 4
xi: oprobit desecurity2 lag_gap_mjrival01_nato lag_civilwar lag_concen lag_delegation lag_mem lag_ipd_std southx2 i.year, cluster(nbloc) robust

** Table 3: Predicted Probability of REO Security Depth due to Changes in Statistically Significant Independent Variables **

oprobit desecurity2 rso_1 lag_reo_mjrival01 lag_civilwar lag_concen lag_delegation lag_mem lag_ipd_std southx2 year, cluster(nbloc) robust

prvalue, x(lag_reo_mjrival01=1) rest(mean)
prvalue, x(lag_reo_mjrival01=0) rest(mean)

prvalue, x(lag_delegation=0.2) rest(mean)
prvalue, x(lag_delegation=0) rest(mean)

prvalue, x(lag_mem=12.2 ) rest(mean)
prvalue, x(lag_mem=3.28 ) rest(mean)

prvalue, x(southx2=1) rest(mean)
prvalue, x(southx2=0) rest(mean)

oprobit desecurity2 lag_gap_mjrival01 lag_civilwar lag_concen lag_delegation lag_mem lag_ipd_std southx2 year, cluster(nbloc) robust

prvalue, x(lag_gap_mjrival01=1) rest(mean)
prvalue, x(lag_gap_mjrival01=0) rest(mean)

prvalue, x(lag_civilwar=19.15) rest(mean)
prvalue, x(lag_civilwar=0) rest(mean)

prvalue, x(lag_ipd_std=0.60) rest(mean)
prvalue, x(lag_ipd_std=0.060) rest(mean)

** Table 4: Additional Models of the Sources of Security Substructures within REOs, 1982-2012 **

* Model 5 - with REO rivalry and RSO rivailry as two seperate variables *
xi: oprobit desecurity2 lag_reo_mjrival01 lag_rso_mjrival01 lag_civilwar lag_concen lag_delegation lag_mem lag_ipd_std southx2 i.year, cluster(nbloc) robust

* Model 6 - Logit Model with dummy variable (1 for either low or high security organs) - Only REO Rivalry *
xi: xtlogit desecurity_01L lag_reo_mjrival01 lag_civilwar lag_concen lag_delegation lag_mem lag_ipd_std southx2 i.year

* Model 7 - like Model 6 + RSO Rivalry *
xi: xtlogit desecurity_01L lag_reo_mjrival01 lag_rso_mjrival01 lag_civilwar lag_concen lag_delegation lag_mem lag_ipd_std southx2 i.year

* Model 8 - Dummy DV - Logit with Fixed Effects - REO and RSO rivalry 
 xi: xtlogit desecurity_01L lag_reo_mjrival01 lag_rso_mjrival01 lag_civilwar lag_concen lag_delegation lag_mem lag_ipd_std southx2 i.year, fe

** Appendix Tables **
* summary stats.
sum desecurity2 desecurity_01L rso_1 rso_hp lag_reo_mjrival01 lag_rso_mjrival01 lag_gap_mjrival01 lag_gap_mjrival01_nato lag_civilwar lag_concen lag_delegation lag_mem lag_ipd_std southx2

*** End Do File ***
